# Supplementary material for: Improving smoking cessation after myocardial infarction by systematically implementing evidence-based treatment methods
Source: PubMed Central journal article supplement (PMC8755785; doi:10.1038/s41598-021-04634-5), 2022-01-12
Supplement: 41598_2021_4634_MOESM1_ESM.pdf [file 41598_2021_4634_MOESM1_ESM.pdf]

*Supplementary information file*

**Improving smoking cessation after myocardial infarction by systematically implementing evidence-based treatment methods**

Author list: Margret Leosdottir, Sanne Wärjerstam, Halldora Ögmundsdottir Michelsen, Mona Schlyter, Emma Hag, John Wallert, Matz Larsson

**Supplementary Table S1.** Smoking cessation treatment and care at each participating hospital before implementation of the new routines.

|            | CR nurses<br>counsel<br>patients during<br>admission | Patients are<br>offered NRT<br>during<br>admission | Varenicline is<br>initiated before<br>discharge | Varenicline is<br>prescribed during<br>follow-up | Smoking patients are<br>contacted by<br>telephone during 1 <sup>st</sup><br>week post discharge | We strive for continuity<br>in patient-nurse contact<br>throughout follow-up |
|------------|------------------------------------------------------|----------------------------------------------------|-------------------------------------------------|--------------------------------------------------|-------------------------------------------------------------------------------------------------|------------------------------------------------------------------------------|
| Malmö      | Orange                                               | Green                                              | Orange                                          | Yellow                                           | Orange                                                                                          | Green                                                                        |
| Örebro     | Yellow                                               | Green                                              | Green                                           | Green                                            | Yellow                                                                                          | Green                                                                        |
| Trelleborg | Orange                                               | Green                                              | Orange                                          | Orange                                           | Orange                                                                                          | Orange                                                                       |
| Jönköping  | Orange                                               | Green                                              | Orange                                          | Yellow                                           | Orange                                                                                          | Green                                                                        |
| Värnamo    | Orange                                               | Green                                              | Yellow                                          | Yellow                                           | Orange                                                                                          | Green                                                                        |
| Eksjö      | Yellow                                               | Green                                              | Orange                                          | Yellow                                           | Orange                                                                                          | Light Green                                                                  |

CR, cardiac rehabilitation; NRT, nicotine replacement therapy. **Orange** = New routine; **yellow** = partly new routine; **green** = already implemented.

**Supplementary Table S2.** Inclusion time frames and number of patients for the reference vs implementation periods at each participating hospital.

| Hospital   | Reference period |           |                                |                          | Implementation period |           |                                |                          |
|------------|------------------|-----------|--------------------------------|--------------------------|-----------------------|-----------|--------------------------------|--------------------------|
|            | Start date       | Stop date | Total number<br>of MI patients | n (%)<br>current smokers | Start date            | Stop date | Total number<br>of MI patients | n (%)<br>current smokers |
| Malmö      | 22-07-17         | 22-09-18  | 311                            | 105 (34)                 | 22-10-18              | 22-12-19  | 327                            | 128 (39)                 |
| Örebro     | 07-12-17         | 07-12-18  | 152                            | 44 (29)                  | 07-01-19              | 07-01-20  | 145                            | 41 (28)                  |
| Trelleborg | 01-06-18         | 01-03-19  | 46                             | 17 (37)                  | 01-04-19              | 01-01-20  | 63                             | 16 (25)                  |
| Jönköping  | 23-08-18         | 23-12-18  | 46                             | 10 (22)                  | 23-08-19              | 23-12-19  | 53                             | 2 (4)                    |
| Värnamo    | 01-09-18         | 31-12-18  | 23                             | 2 (9)                    | 01-09-19              | 31-12-19  | 26                             | 5 (19)                   |
| Eksjö      | 01-09-18         | 31-12-18  | 23                             | 10 (43)                  | 01-09-19              | 31-12-19  | 18                             | 3 (17)                   |
| All        |                  |           | 601                            | 188 (31)                 |                       |           | 632                            | 195 (31)                 |

MI, myocardial infarction.

**Supplementary Table S3.** Odds ratios for smoking abstinence at 2-months post-MI for patients exposed to each routine, with patients from both periods (reference and implementation) included.

| Routine                                                      | n=338<br>(yes/no/missing) | Crude            |       | Adjusted*        |       |
|--------------------------------------------------------------|---------------------------|------------------|-------|------------------|-------|
|                                                              |                           | OR [95% CI]      | p     | OR (95% CI)      | p     |
| Counselling during hospital admission                        | 98/237/3                  | 2.49 [1.48-4.19] | 0.001 | 2.53 [1.39-4.63] | 0.003 |
| Contact during the 1 <sup>st</sup> week post-discharge       | 36/296/6                  | 3.71 [1.50-9.17] | 0.005 | 3.60 [1.41-9.19] | 0.007 |
| Prescription of varenicline at discharge or during follow-up | 54/280/2                  | 0.62 [0.34-1.11] | 0.108 | 0.59 [0.32-1.10] | 0.098 |
| Prescription of NRT at discharge or during follow-up         | 69/265/2                  | 0.58 [0.34-0.99] | 0.045 | 0.49 [0.28-0.87] | 0.014 |
| Continuity in nurse-patient care**                           | 212/126/0                 | 1.59 [1.02-2.49] | 0.04  | 1.63 [1.02-2.61] | 0.043 |

Crude and adjusted odds ratios are shown. Patients exposed are compared to those not exposed. OR, odds ratio; CI, confidence interval; NRT, nicotine replacement therapy. \*Adjusted for age (year), gender (male/female), size of hospital (small, medium, large), length of hospital stay (days), whether the patient was discharged during the weekend or during holidays (yes/no), and period of study (reference/implementation). \*\*At least two-thirds of nurse-patient contacts (physical visits/telephone) with same nurse.
